# Supplementary material for: Defining the Characteristics of Successful Biosecurity Scent Detection Dogs
Source: Animals (Basel). 2023 Jan 31;13(3):504. doi: 10.3390/ani13030504 (PMC9913823; doi:10.3390/ani13030504)
Supplement: Supplementary file 1 [file animals-13-00504-s001.zip › animals-2128378-supplementary.pdf]

*Table S1.* A correlation table depicting Spearman's rho correlation coefficients and significance values between MCPQ-R variables and work behaviour questionnaire variables. Highlighted are the expected correlations based on theoretical relatedness.

|              |      | Search<br>motivation | Emotional<br>stability | Search<br>arousal | Food<br>motivation | Play<br>motivation | Search<br>independence | Focus |
|--------------|------|----------------------|------------------------|-------------------|--------------------|--------------------|------------------------|-------|
| Extraversion | Rho  | .106                 | -.069                  | .444              | .013               | .111               | .006                   | -.105 |
|              | Sig. | .537                 | .688                   | .007              | .941               | .519               | .973                   | .540  |
| Motivation   | Rho  | .526                 | .509                   | .695              | .224               | .270               | .549                   | .373  |
|              | Sig. | <.001                | .002                   | <.001             | .189               | .112               | <.001                  | .025  |
| Trainability | Rho  | .506                 | .422                   | .462              | .061               | .307               | .402                   | .353  |
|              | Sig. | .002                 | .010                   | .005              | .723               | .069               | .015                   | .035  |
| Amicability  | Rho  | .329                 | .537                   | .218              | .144               | .075               | .177                   | .262  |
|              | Sig. | .050                 | <.001                  | .202              | .403               | .666               | .302                   | .122  |
| Neuroticism  | Rho  | -.473                | -.617                  | -.293             | -.169              | -.279              | -.389                  | -.162 |
|              | Sig. | .004                 | <.001                  | .083              | .324               | .099               | .019                   | .346  |
